# Supplementary material for: Replication of patient specific circulating tumor cells on a microfibrous filter for drug screening
Source: Royal Society of Chemistry journal article supplement (doi:10.1039/d4nr05294c), 2025-01-01
Supplement: d4nr05294c1.pdf [file d4nr05294c1.pdf]

## Supporting Information

### Patient specific circulating tumor cells replicate on microfibrinous filter for drug screening

Grith Skovborg,<sup>1#</sup> Frederik Højberg Svejsø,<sup>1#</sup> Christoph Müller,<sup>1</sup> Bjarke Nørrehvedde Jensen,<sup>1</sup> Jesper Godrim Jensen,<sup>1</sup> Sara Egsgaard Majidi,<sup>1</sup> Cecilie Linneberg Matthiesen,<sup>1</sup> Menglin Chen<sup>1\*</sup>

<sup>1</sup>*Department of Biological and Chemical Engineering, Aarhus University, Aarhus DK-8000, Denmark*

<sup>#</sup>These authors contributed equally to the work.

\*Corresponding author E-mail: [menglin@bce.au.dk](mailto:menglin@bce.au.dk)

#### SEM images of filters printed at different speeds

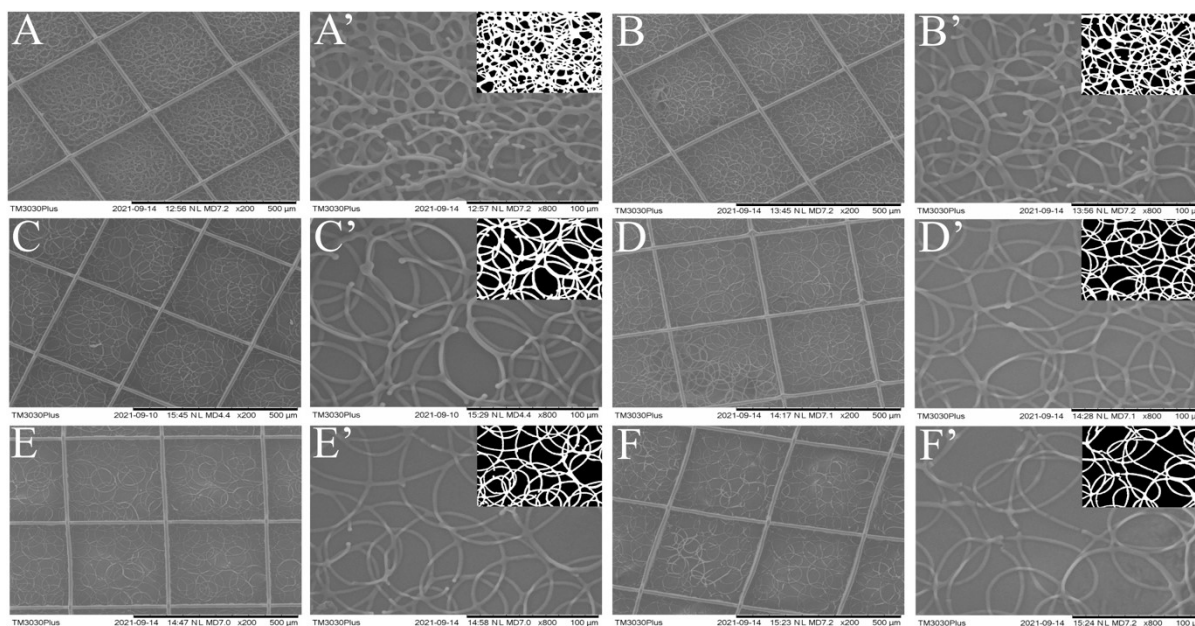

**Fig. S1.: Representative SEM images of filters printed at different collector speeds. (A-F)** x200 magnification images of 100, 200, 300, 400, 500, and 600 mm/min, respectively. **(A'-F')** x800 magnification images of 100, 200, 300, 400, 500, and 600 mm/min, respectively. Inserts are segmented binary images used for pore analysis.

## Anti-EpCAM stability

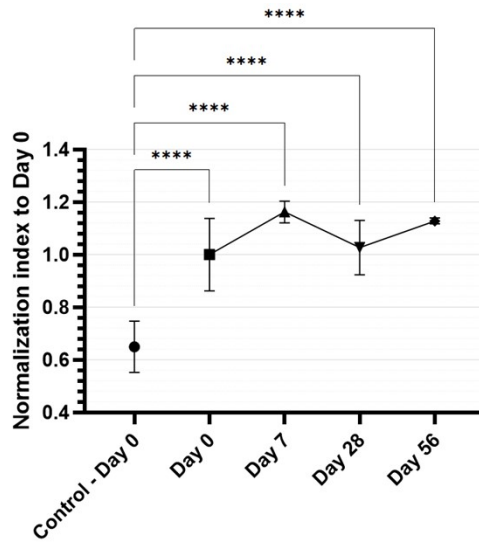

**Fig. S2.: Stability of bioconjugated anti-EpCAM on 300 mm/min filters.** Data normalized to the control. Control was bioconjugated replacing the anti-EpCAM step with 1% BSA/PBS and analyzed at day 0. Time points indicate time between bioconjugated and analysis.  $n = 3$ , mean  $\pm$  SD, ordinary one-way ANOVA performed using GraphPad Prism, \*\*\*\*  $p$ -value  $< 0.0001$ .

## WBC capture

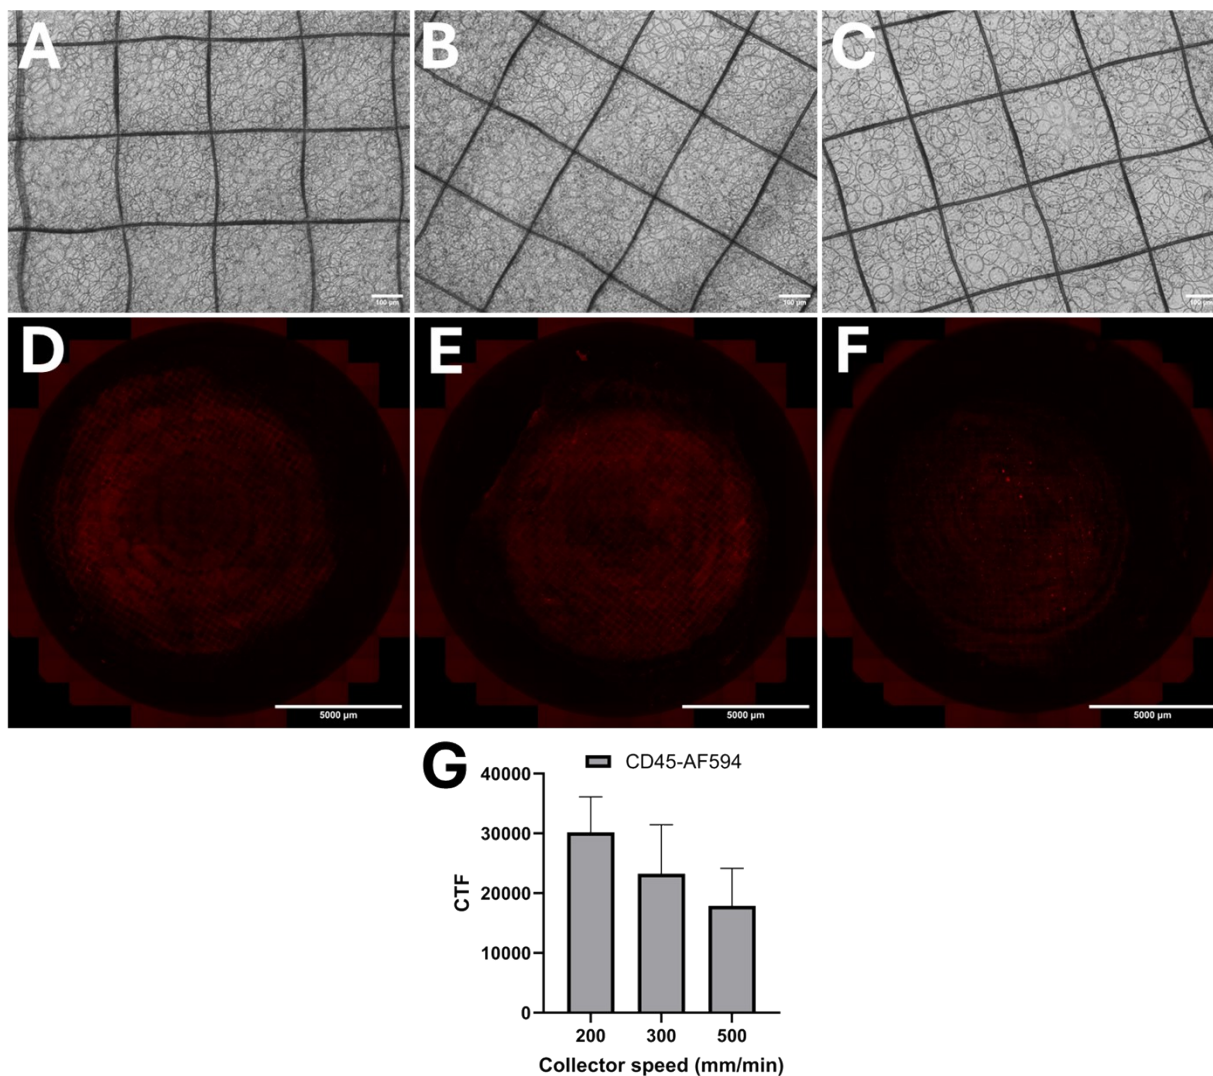

**Fig. S3.: Capture of white blood cells.** (A-C) Brightfield images of filters after blood filtration through filters printed at (A) 200, (B) 300, and (C) 500 mm/min, respectively. (D-F) Stitched images of CD45 staining after blood filtrations through filter printed at (D) 200, (E) 300, and (F) 500 mm/min, respectively. (G) Fluorescence intensity based on the grey values of the fluorescence images shown. CTF = corrected total fluorescence.

### Drug effect at end point (72h)

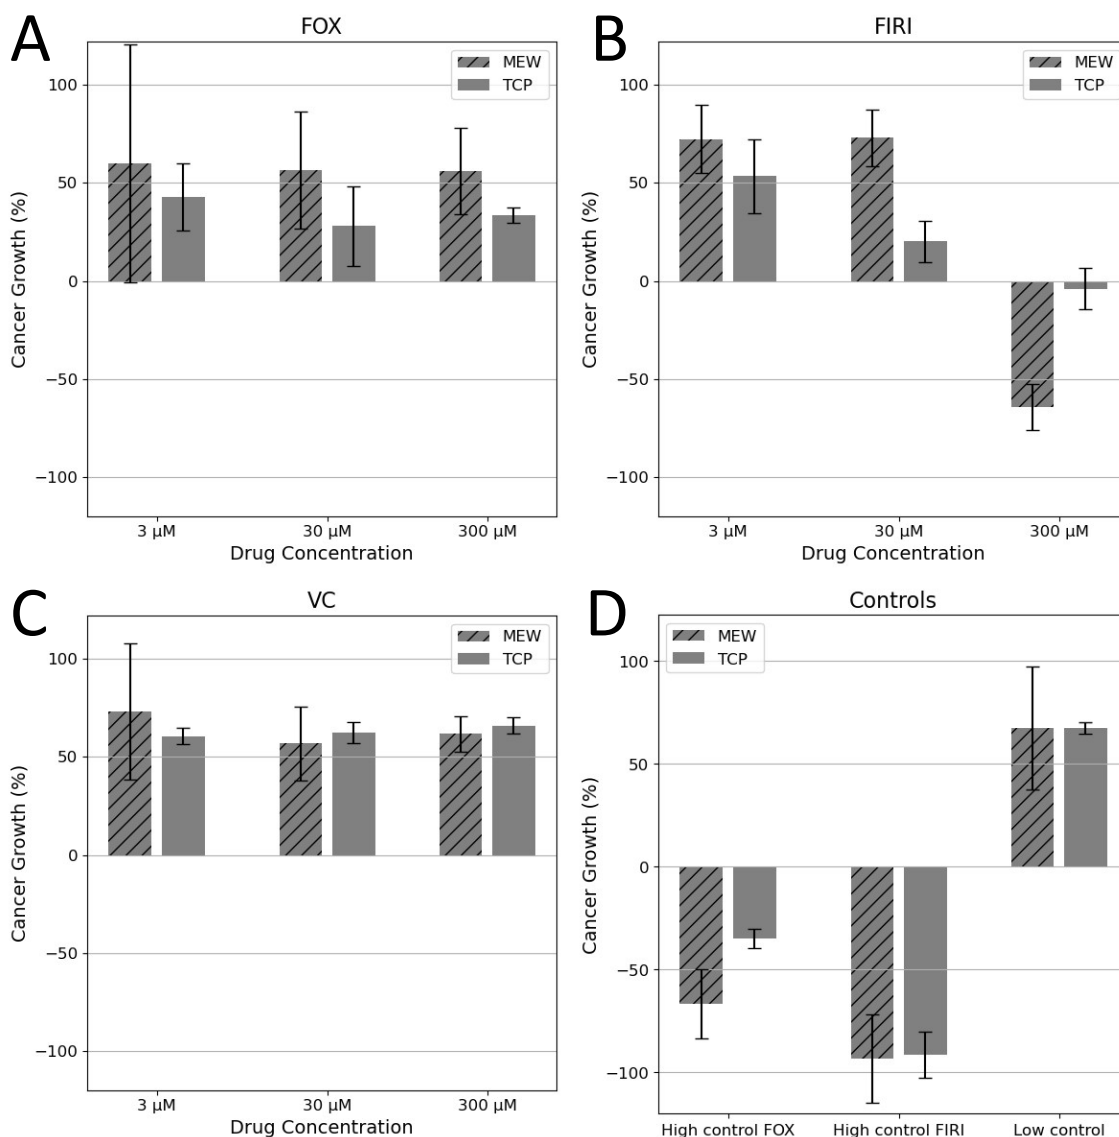

**Fig. S4.: Cancer growth after 72-hour drug exposure.** CTC44 cells cultured on filter scaffolds and TCPs were exposed to combinations of 5-fluorouracil and oxaliplatin (FOX) and 5-fluorouracil and irinotecan (FIRI) for 72 hours at concentrations of 3  $\mu$ M, 30  $\mu$ M, and 300  $\mu$ M. Cancer growth is expressed as the percentage change in area covered by cancer cells from 0 hours to 72 hours. High controls had a drug concentration of 10 mM while low control were pure growth media. **(A)** Cancer growth after 72-hour exposure to FOX at three different concentrations. **(B)** Cancer growth after 72-hour exposure to FIRI at three different concentrations. **(C)** Cancer growth after 72-hour exposure to VC at three different concentrations. **(D)** Cancer growth after 72-hour exposure to control solutions.
